# Supplementary material for: Telomere Lengths, Pulmonary Fibrosis and Telomerase (TERT) Mutations
Source: PLOS journal article supplement (doi:10.1371/journal.pone.0010680), 2010-05-19
Supplement: S3 (10.1371/journal.pone.0010680.s003) [file journal.pone.0010680.s003.pdf › journal.pone.0010680.s003.pdf]

**Supplemental Table 1. Distribution of *TERT* Mutations for 134 Heterozygous Mutation Carriers**

| <b>Mutation</b> | <b>Number of Subjects</b> | <b>Percent (%)</b> |
|-----------------|---------------------------|--------------------|
| P33S            | 3                         | 2.2                |
| V144M           | 30                        | 22.4               |
| R486C           | 6                         | 4.5                |
| R631Q           | 6                         | 4.5                |
| R671W           | 1                         | 0.7                |
| V694M           | 2                         | 1.5                |
| P702L           | 24                        | 17.9               |
| P704S           | 4                         | 3.0                |
| V747fs          | 12                        | 9.0                |
| R865H           | 18                        | 13.4               |
| R865C           | 2                         | 1.5                |
| V867M           | 1                         | 0.7                |
| H925Q           | 2                         | 1.5                |
| R951W           | 5                         | 3.7                |
| S957R           | 3                         | 2.2                |
| L1019F          | 2                         | 1.5                |
| K1050E          | 2                         | 1.5                |
| G1063S          | 5                         | 3.7                |
| E1116fs         | 4                         | 3.0                |
| <b>Total</b>    | <b>134</b>                | <b>100</b>         |
